# Supplementary material for: Predictive value of CD3+ cells and interleukin 2 receptor in systemic inflammatory response syndrome after percutaneous nephrolithotomy
Source: Front Immunol. 2022 Nov 24;13:1017219. doi: 10.3389/fimmu.2022.1017219 (PMC9730695; doi:10.3389/fimmu.2022.1017219)
Supplement: Supplementary file 1 [file DataSheet_1.xlsx]

## Sheet: Sheet1
Age	Gender	BMI	Diabetes	Hypertension	staghorn calculi	stone side	Stone area	Hydronephrosis	Operation Time	suegery	SIRS	WBC	Lymphocytes	Neutrophils	Hemoglobin	Total protein	Albumin	Globulin	AGR	Creatinine	BUN	Uric acid	eGRF	Urine culture	Hematuria	Urine leukocytes	Urine protein	Urine nitrite	IL-1β	IL-2R	IL-6	IL-8	IL-10	TNF-α	Percentage of CD3+ cells	CD3+ cells	Percentage of CD19+ cells	CD19+ cells	Percentage of CD3+ CD4+ cells	CD3+CD4+ cells	Percentage of CD3+ CD8+cells	CD3+ CD8+cells	Percentage of CD3- CD56+ cells	CD3- CD56+ cells	Percentage of TBNK cells	TBNK cells	CD4+/CD8+	CD3+CD4+CD28+ cells	CD3+CD8+CD28+cells
47	2	20.5	0	0	0	1	152	1	199	RP	0	7.37	0.51	6.3	77	56.1	32.1	24	1.3375	171	6.06	201	30.3	0	1	1	1	0	0	775	0.99	36.4	1	13.4	0.8439	898	0.0901	96	0.5614	597	0.2402	256	0.0604	64	0.9944	1058	2.34	0.9009	0.6547
58	1	24.33	0	0	0	3	170	1	127	RP	1	6.77	2.53	3.59	122	70.7	40.4	30.3	1.33333	175	8.43	463	36.2	1	0	1	0	0	0	1239	1	20.3	0	13.7	0.808	2016	0.1214	303	0.5835	1456	0.2087	521	0.062	155	0.9914	2474	2.8	0.8717	0.4846
56	1	30.49	0	0	0	2	220	1	106	LP	0	7.36	1.94	4.83	157	67.8	41.4	26.4	1.56818	83	6.9	421	90.4	0	1	1	1	0	1	269	2.62	17.6	1	7.7	0.8032	1450	0.0613	111	0.4735	855	0.3157	570	0.1346	243	0.9991	1804	1.5	0.8913	0.4731
56	2	24.24	0	0	1	3	760.5	1	189	LP	1	6.28	1.76	3.88	112	73.4	35.5	37.9	0.936675	237	11	521	19.2	1	1	1	1	0	0	822	26.84	16.8	0	12	0.6952	1136	0.0782	128	0.3476	568	0.3268	534	0.216	353	0.9894	1617	1.06	0.9526	0.5132
58	2	19.43	0	0	0	2	86	1	35	LP	0	4.95	1.61	2.87	130	69.8	43.2	26.6	1.62406	67	5.47	219	87	0	0	0	0	0	0	408	1	12.8	0	6.9	0.787	1140	0.1218	176	0.5376	779	0.1971	285	0.0873	126	0.9961	1442	2.73	0.9279	0.7785
36	1	16.61	0	0	0	2	459	1	125	LP	0	6.52	0.84	7.08	97	80.8	41.9	38.9	1.07712	195	10.4	619	37	0	1	0	1	0	0	1137	5.5	9	0	43.2	0.8701	882	0.0444	45	0.5188	526	0.3141	318	0.0812	82	0.9957	1009	1.65	0.6527	0.487
59	2	26.56	0	1	0	2	54	1	205	LP	1	5.86	1.62	3.42	131	71.7	41	30.7	1.3355	64	5.13	312	91.3	0	0	1	0	0	0	484	1.6	32.4	0	10.5	0.721	1120	0.1389	216	0.5024	780	0.199	309	0.1329	206	0.9928	1542	2.52	0.999	0.871
31	1	20.05	0	0	1	3	1722	1	155	RP	1	6.61	0.96	2.16	97	59.1	36.5	22.6	1.61504	1094	10.51	526	4.8	0	1	1	1	0	1	1383	5.4	14.3	0	15.5	0.745	771	0.0972	101	0.4968	514	0.2151	223	0.155	160	0.9972	1032	2.31	0.9763	0.5537
29	1	24.49	0	0	0	2	140	1	86	LP	0	7.09	2.01	4.12	143	63.1	40.1	23	1.74348	82	4.52	330	110.9	0	1	1	1	0	1	420	2.52	69.5	0	9.2	0.8264	1792	0.043	93	0.5037	1094	0.2513	546	0.12	261	0.9876	2146	2	0.9786	0.674
44	2	16.9	0	0	0	1	207	1	130	RP	1	4.57	1.81	2.23	134	75.6	43.5	32.1	1.35514	59	4.03	233.9	107.4	0	1	1	1	0	0	337	1	16.1	0	5.5	0.6296	740	0.1432	168	0.4496	528	0.1268	149	0.2112	248	0.984	1156	3.55	0.9287	0.5893
57	1	24.09	0	0	1	3	216	1	141	LP	0	6.22	1.3	4.08	142	66.5	40.2	26.3	1.52852	114	5.7	536	61.2	0	1	1	0	0	1	633	1.01	52.1	0	14.5	0.7502	971	0.1035	134	0.516	668	0.2038	264	0.1415	183	0.9952	1288	2.53	0.9975	0.6823
52	2	21.64	0	0	0	1	80	1	56	RP	0	4.41	1.43	2.58	138	63.6	36.9	26.7	1.38202	66	4.57	310	92.4	0	0	0	0	0	1	426	1	17.8	0	40.4	0.8628	1678	0.0341	66	0.4543	883	0.3812	741	0.1004	195	0.9973	1939	1.19	0.7974	0.3192
49	2	23.83	0	1	1	3	1075	1	184	RP	0	8.44	1.91	6.59	75	88.4	36.7	51.7	0.709865	317	11.78	55	14.2	0	1	1	1	0	1	931	43.46	19.8	0	25.1	0.7799	1459	0.0909	170	0.4087	765	0.3297	617	0.1256	235	0.9964	1864	1.24	0.8671	0.5067
57	1	19.73	0	0	0	3	156	1	95	RP	0	6.74	1.37	4.66	149	79.8	40.6	39.2	1.03571	202	9	395	30.6	0	1	1	0	0	0	878	45.8	91.7	1	21.9	0.6467	892	0.1677	231	0.4451	614	0.1816	251	0.1792	247	0.9936	1370	2.45	0.9935	0.654
62	2	24.92	0	1	0	1	91	1	78	RP	0	4.45	0.47	3.81	100	73.9	34	39.9	0.85213	102	6.14	269	50.9	0	0	0	0	0	0	512	5.16	11.9	0	8	0.8439	1011	0.0923	111	0.5983	716	0.2056	246	0.0574	69	0.9936	1191	2.91	0.9807	0.7055
26	1	24.34	0	0	0	2	48	1	94	LP	1	7.6	1.8	4.73	140	70.1	40.7	29.4	1.38435	144	6.19	259	57.3	0	1	1	0	0	1	467	4.8	238	0	11.4	0.8237	1265	0.0603	93	0.4779	734	0.3114	478	0.11	169	0.994	1527	1.53	0.9664	0.8809
35	1	24.82	0	0	0	2	56	1	55	LP	0	6.74	2.42	3.37	151	69.1	42	27.1	1.54982	97	6.33	404	86.8	0	0	0	0	0	0	603	6.42	23	0	9.9	0.7198	1775	0.2076	512	0.5142	1268	0.1891	466	0.0692	171	0.9966	2458	2.72	0.9691	0.7953
53	2	25	0	1	1	3	336	1	110	RP	1	7.98	1.77	4.46	117	73.8	39.5	34.3	1.1516	128	6.16	463	41.2	1	1	1	0	1	0	572	8.84	6	0	13.4	0.6545	1126	0.1567	270	0.4378	753	0.201	346	0.1816	313	0.9928	1709	2.18	0.9836	0.7905
71	2	18.03	0	1	0	2	360	1	125	LP	0	3.11	0.54	2.07	94	63.9	31.8	32.1	0.990654	95	5.97	316	52.1	0	1	1	1	0	0	708	11.81	14.5	0	10.3	0.8053	505	0.0562	35	0.4805	302	0.3224	202	0.1313	82	0.9928	622	1.49	0.5849	0.2672
31	2	26.04	0	0	1	3	476	1	107	LP	0	7.52	2.14	4.83	148	74.8	43.2	31.6	1.36709	108	6.26	323	59.1	0	1	1	0	0	1	636	3.11	13.3	0	13.5	0.7953	1495	0.1258	237	0.4369	821	0.3123	587	0.0724	136	0.9935	1868	1.4	0.9674	0.5992
63	1	25	0	1	1	3	780	1	140	LP	1	6.01	1.75	3.45	144	76.6	44.5	32.1	1.38629	93	6.12	342	75	0	1	1	1	0	1	454	2.4	11.3	0	8.8	0.5935	994	0.1613	270	0.4516	757	0.1313	220	0.2305	386	0.9853	1650	3.44	0.9944	0.7882
72	2	22.03	0	1	0	1	238	1	111	RP	1	6.09	1.21	3.42	106	67.7	38.1	29.6	1.28716	50	6.05	258	93.1	1	0	1	0	0	0	556	1	18.3	0	6.6	0.7965	947	0.0916	109	0.5885	700	0.1873	223	0.109	130	0.9971	1186	3.14	0.9995	0.9112
30	1	23.15	0	0	0	1	120	0	90	RP	0	6.27	2.23	3.31	125	70.3	43.5	26.8	1.62313	77	6.14	372	115.8	0	0	1	0	0	0	311	1	69	0	9.9	0.7431	1575	0.1531	325	0.483	1024	0.2349	498	0.0988	209	0.995	2109	2.06	0.9542	0.7108
53	1	25.39	0	0	1	2	504	0	165	LP	0	5.1	1.01	3.59	130	74.1	45.5	28.6	1.59091	108	6.32	403	67.2	0	1	1	0	0	0	414	1.91	13	0	9.4	0.6253	688	0.1891	208	0.4354	479	0.1792	197	0.1717	189	0.9861	1085	2.43	0.9291	0.7051
57	2	24.84	1	1	0	3	210	1	108	LP	0	6.87	2.57	3.55	128	80.5	40.7	39.8	1.02261	69	5.98	303	84.6	0	1	1	1	0	0	438	4.8	13.8	0	11.4	0.6899	1626	0.1754	413	0.4245	1000	0.2447	577	0.1257	296	0.991	2335	1.73	0.9551	0.6083
38	1	23.67	0	0	1	3	731	1	79	LP	0	7.02	2.52	5.55	165	72.5	42.7	28.8	1.48264	96	5.4	574	86	0	1	1	0	0	0	306	4.33	7.6	0	9.8	0.7717	1704	0.1018	225	0.3625	800	0.3706	818	0.1237	273	0.9972	2202	0.98	0.9922	0.5474
30	1	20.75	0	0	1	3	336	0	189	RP	0	5.78	2.65	2.48	147	69.1	41.6	27.5	1.51273	110	6.18	345	77.2	0	0	1	0	0	0	267	2.19	9.7	0	9.3	0.772	2006	0.098	255	0.4819	1252	0.251	652	0.1228	319	0.9928	2580	1.92	0.9767	0.859
64	1	25.95	0	1	0	1	48	1	55	RP	0	10.75	1.57	8.36	115	69.2	33.3	35.9	0.927577	94	6.31	357	73.5	1	1	1	0	0	1	394	25.42	11.5	0	7.7	0.591	828	0.1064	149	0.3814	534	0.2025	284	0.2909	408	0.9883	1385	1.88	0.9386	0.7406
51	1	23.39	0	1	0	1	169	1	74	RP	1	7.05	1.89	4.27	165	71.3	41.1	30.2	1.36093	70	7.49	387	103.9	0	0	1	0	0	1	415	1	7	0	7.4	0.6458	1135	0.0873	153	0.4171	733	0.2043	359	0.2644	465	0.9975	1753	2.04	0.9742	0.8443
70	2	26.67	0	1	1	3	324	1	85	LP	0	5.21	1.8	2.88	124	75.1	41.7	33.4	1.2485	66	5.74	436	81.5	0	1	0	0	0	1	354	2.42	9.3	0	9.3	0.6461	1150	0.219	390	0.5157	918	0.1113	198	0.1265	225	0.9916	1765	4.63	0.8891	0.4858
44	2	19.53	0	0	0	1	63	1	110	RP	1	5.01	1.55	3.04	123	55.9	36.2	19.7	1.83756	61	4.6	244	106.2	0	0	0	0	0	0	318	1	6.4	0	5.9	0.8305	1243	0.0681	102	0.6002	898	0.1707	256	0.0981	147	0.9967	1492	3.52	0.9276	0.7115
59	2	21.72	0	1	0	3	289	1	112	RP	0	3.43	1.39	1.65	121	57.7	35	22.7	1.54185	84	5.2	310	65.8	0	1	1	0	0	1	321	0.98	12.3	0	11.3	0.6006	859	0.0753	108	0.3821	547	0.1769	253	0.3171	454	0.993	1421	2.16	0.9324	0.624
49	2	22.89	0	1	0	2	40	1	65	LP	0	6.63	2.18	3.86	133	71.9	42.9	29	1.47931	62	5.94	276	102	0	1	0	0	0	0	389	1	9.6	0	5.4	0.7031	1475	0.0932	196	0.4044	848	0.2546	534	0.2037	427	1	2098	1.59	0.9012	0.5365
49	2	28	0	0	0	2	168	1	149	LP	0	7.44	2.08	4.75	133	77.3	42.3	35	1.20857	60	6.13	386	103.1	1	1	1	1	1	1	475	2.17	8.5	0	8.3	0.7133	1360	0.1761	336	0.4695	895	0.2139	408	0.0989	188	0.9883	1884	2.19	0.9962	0.9028
44	1	28.23	1	0	0	2	78	1	75	LP	0	7.3	2.04	4.16	151	64.8	39.4	25.4	1.55118	114	5.9	449	67	0	0	0	0	0	0	531	3.25	7.4	0	9.4	0.6787	1366	0.1765	355	0.4708	948	0.1789	360	0.1396	281	0.9948	2002	2.63	0.9812	0.766
45	1	29.05	1	1	0	3	240	1	66	RP	0	6.39	2.1	3.51	112	79.6	40.4	39.2	1.03061	86	5.24	527	93.6	0	1	1	0	0	1	286	1.02	11.7	0	11.4	0.8107	1688	0.0652	136	0.526	1095	0.273	568	0.1229	256	0.9988	2080	1.93	0.9974	0.6623
58	2	20.55	0	0	1	1	1344	1	253	RP	1	5.13	0.8	1.81	95	68.3	36.6	31.7	1.15457	58	5.53	233	97.9	1	1	1	1	1	0	379	1	23.3	0	6.9	0.7675	591	0.1049	81	0.502	386	0.2268	175	0.1268	98	0.9992	770	2.21	0.9439	0.5639
49	2	25.69	1	0	0	1	221	0	138	RP	1	6.01	1.45	2.12	140	73.5	42.7	30.8	1.38636	54	7.1	306	106.7	0	1	1	0	0	0	431	2.96	8.2	0	4.3	0.608	739	0.0715	87	0.3485	424	0.2331	284	0.3103	377	0.9898	1203	1.5	0.9956	0.7331
57	1	21.26	0	1	0	1	195	1	59	RP	0	3.28	1.88	1.01	127	64.5	37.6	26.9	1.39777	72	5.6	311	80.3	0	0	1	0	1	0	580	1	12.4	0	7.7	0.761	1414	0.0831	154	0.5369	998	0.2094	389	0.1522	283	0.9963	1851	2.56	0.9245	0.6247
31	1	26.03	0	0	0	1	264	1	79	RP	0	7.42	2.17	4.26	157	65.5	42.2	23.3	1.81116	85	5	545	104.7	0	0	1	0	0	0	458	1	8.8	0	18.7	0.7743	1728	0.1473	329	0.4418	986	0.2601	580	0.076	170	0.9976	2227	1.76	0.9229	0.731
41	1	23.05	0	0	0	3	552	1	168	RP	0	7.45	2.32	4.48	158	71.5	47.2	24.3	1.94239	101	6.48	434	79.2	0	1	1	0	0	0	253	1	4	0	9.2	0.7103	1668	0.1108	260	0.3455	812	0.3211	754	0.1737	408	0.9948	2336	1.08	0.9197	0.4924
85	1	25.78	0	1	1	2	448	1	100	LP	0	6.61	1.1	4.76	103	70.7	38.2	32.5	1.17538	121	7.5	282	46.7	0	1	1	1	0	1	410	135.5	51.7	0	37	0.8544	903	0.0915	97	0.4479	473	0.3739	395	0.0521	55	0.998	1055	1.2	0.5455	0.2053
77	2	13.67	0	0	1	2	874	1	161	RP	0	4.01	1.02	2.43	95	57.1	34.8	22.3	1.56054	85	8.85	312	57.1	0	1	1	1	0	1	469	1	20.6	0	28.2	0.5971	473	0.0701	56	0.3304	262	0.2219	176	0.33	262	0.9972	791	1.49	0.933	0.6279
55	2	26.67	0	1	1	3	150	1	75	RP	0	6.38	2.49	3.37	126	67.1	40.8	26.3	1.55133	85	4.9	334	66.7	0	0	0	1	0	0	454	1.95	20.3	0	51.2	0.8116	1995	0.1079	265	0.5343	1313	0.2447	602	0.0789	194	0.9984	2454	2.18	0.9993	0.7081
53	2	20.55	0	0	0	1	96	1	70	RP	0	5.34	1.76	3.08	122	61	37.2	23.8	1.56303	55	2.96	353	103.2	0	1	1	0	0	1	187	8.92	109	0	59.4	0.7113	1250	0.1184	208	0.4837	850	0.2006	353	0.1632	287	0.9929	1745	2.41	0.8963	0.5007
49	2	24.24	0	1	1	3	1332	1	260	LP	1	8.23	2.07	5.27	76	89.3	41.3	48	0.860417	221	7.72	622	21.9	0	1	1	1	0	1	733	13.71	20.5	0	23.7	0.7746	1562	0.087	175	0.4029	812	0.3	605	0.1344	271	0.996	2008	1.34	0.8825	0.549
59	2	27.24	0	1	0	2	960	1	164	LP	0	6.27	2.1	3.41	107	63.3	36	27.3	1.31868	48	5.74	329	103.4	0	1	1	1	0	1	206	12.62	6.8	0	11.2	0.7564	1578	0.0608	127	0.4517	942	0.2587	540	0.1793	374	0.9965	2079	1.75	0.9231	0.393
52	1	20.08	0	0	0	2	624	1	126	LP	0	6.5	2.76	3.14	155	67.2	44.1	23.1	1.90909	71	6.23	316	102.5	0	1	1	0	0	1	595	2.32	216	0	58.6	0.6681	2077	0.1641	510	0.4507	1401	0.1689	525	0.1652	514	0.9974	3101	2.67	0.966	0.7264
59	2	22.6	1	0	1	1	527	1	115	RP	0	4.25	1.08	2.62	121	68.3	37.2	31.1	1.19614	77	6.6	462	73	0	0	1	0	0	0	1230	13.82	40.1	0	65.9	0.7154	732	0.1789	183	0.5068	519	0.1821	186	0.0957	98	0.99	1013	2.78	0.9763	0.539
62	1	21.09	0	1	0	3	242	1	92	RP	0	4.82	1.64	2.46	132	72.8	42.9	29.9	1.43478	94	6.32	618	74.6	0	1	1	1	0	1	664	8.15	27.1	0	13.7	0.8152	1250	0.0543	83	0.5467	838	0.176	270	0.1265	194	0.996	1527	3.11	0.9686	0.3665
67	2	22.22	0	0	1	3	1760	1	101	RP	1	6.14	1.77	3.64	86	72.3	39	33.3	1.17117	212	11.4	419	20.3	1	1	1	1	0	1	1290	11.35	51.9	0	48.8	0.6964	1202	0.1676	289	0.3744	646	0.2828	488	0.134	231	0.998	1722	1.32	0.8916	0.5366
48	2	15.18	0	0	0	1	128	0	102	RP	0	2.59	1.2	1.07	108	67.1	39.5	27.6	1.43116	61	7.1	223	103.3	1	0	1	0	1	1	330	1.61	9.5	0	7.9	0.6756	823	0.1301	158	0.5247	643	0.1298	158	0.1892	230	0.9949	1211	4.06	0.9921	0.8602
30	1	33.95	0	0	0	2	288	1	114	LP	0	6.65	2.37	3.47	162	73	43.1	29.9	1.44147	80	5.79	462	113.9	0	0	0	0	0	1	543	3.42	153	0	123	0.7709	1999	0.1284	333	0.5314	1378	0.1946	505	0.0959	249	0.9952	2581	2.73	0.9784	0.8097
56	1	24.02	0	1	0	3	195	1	143	LP	1	6.12	1.52	1.88	142	69.4	39.8	29.6	1.34459	88	5.57	452	84.2	0	0	0	0	0	0	469	2.68	13.3	0	8.8	0.683	1062	0.0855	133	0.3486	542	0.2756	429	0.2234	347	0.9919	1572	1.26	0.9855	0.5143
41	1	29.4	0	0	0	2	238	0	90	LP	0	7.06	3.36	4.73	160	75.1	46.2	28.9	1.59862	81	7.16	495	103.4	0	0	0	0	0	1	509	1.86	9.6	0	6.5	0.759	2555	0.1326	446	0.4862	1637	0.2315	779	0.1017	342	0.9933	3343	2.1	0.999	0.6766
57	1	18.94	0	0	0	2	288	1	123	LP	1	7.26	1.62	4.93	131	72.7	40	32.7	1.22324	125	6.5	386	54.7	0	1	1	1	1	1	913	36.44	15.4	0	14.2	0.6548	1151	0.1288	226	0.4564	803	0.17	299	0.2084	366	0.992	1743	2.68	0.9909	0.6087
31	1	26.57	1	0	1	2	408	1	148	LP	1	8.95	2.11	3.12	133	74.7	44.9	29.8	1.50671	130	6.79	483	62.6	1	1	1	1	0	1	550	8.84	22.3	0	12.7	0.7758	1790	0.1228	284	0.3705	856	0.3347	774	0.0991	229	0.9967	2303	1.11	0.9932	0.7235
68	2	17.93	0	0	0	3	210	1	53	RP	0	3.58	1.02	2.03	110	64	41.6	22.4	1.85714	66	5.8	280	82.6	0	1	0	0	0	0	538	1	49.1	0	8.3	0.7446	788	0.0433	46	0.2618	277	0.4114	435	0.2009	213	0.9888	1047	0.64	0.9299	0.4691
62	1	21.55	0	0	0	3	99	1	60	LP	1	6.16	1.17	1.67	136	67.1	43.3	23.8	1.81933	132	6.3	377	49.5	0	0	0	0	0	1	277	1.01	16.1	0	7.5	0.6483	734	0.1726	195	0.3631	411	0.2546	288	0.1738	197	0.9702	1126	1.43	0.9702	0.4626
31	1	20.07	0	0	0	1	63	1	90	RP	0	5.93	1.54	3.55	119	63.9	36.4	27.5	1.32364	73	5.89	391	117.5	0	1	1	1	0	0	364	3.28	14.6	0	5.7	0.708	1158	0.1052	172	0.3652	597	0.2972	486	0.1816	297	0.9948	1627	1.23	0.9327	0.4798
49	2	24.65	0	1	0	1	540	1	110	RP	0	5.43	1.83	5.92	82	82.7	38.4	44.3	0.866817	193	8.2	553	25.8	0	1	1	1	0	1	670	7.68	12.5	0	15.1	0.7224	1240	0.1122	193	0.3654	627	0.2983	512	0.1605	276	0.9951	1709	1.22	0.8696	0.5326
67	2	20.03	0	0	1	3	270	1	110	LP	1	6.89	2.21	3.79	100	85.2	42.3	42.9	0.986014	193	10.71	526	22.7	1	1	1	1	1	1	1406	10.31	11.3	0	13.9	0.6297	1409	0.1113	249	0.3203	717	0.2685	601	0.2568	575	0.9978	2233	1.19	0.7831	0.398
55	1	28.33	0	0	0	1	336	1	92	RP	0	6.79	1.89	4.21	139	71.9	39.3	32.6	1.20552	84	6.2	397	89.7	0	1	1	0	0	1	352	1	21.5	0	7.9	0.7747	1646	0.0953	203	0.4932	1048	0.2217	471	0.1276	271	0.9976	2120	2.22	0.9271	0.4542
65	1	24.58	0	1	0	2	120	1	142	LP	0	6.37	1.93	4.72	151	69	40.2	28.8	1.39583	98	5.4	413	69.4	0	0	0	0	0	0	483	7.98	20.8	0	15.2	0.7909	1916	0.0887	215	0.6442	1561	0.1309	317	0.1158	280	0.9954	2411	4.92	0.8928	0.6841
49	1	23.74	0	0	0	1	80	0	70	LR	0	5.77	1.67	3.55	123	71.7	41.2	30.5	1.35082	65	5.68	367	108.6	0	1	0	1	0	0	457	6.48	8.5	0	7.4	0.8198	1065	0.0778	101	0.6313	820	0.1715	223	0.0982	128	0.9958	1294	3.68	0.9266	0.4311
48	2	25.39	0	0	0	2	64	1	59	LR	0	2.77	1.14	1.39	115	73.1	48.1	25	1.924	54	6.26	270.8	107.5	0	1	0	0	0	0	270	1.78	7.9	0	7.7	0.767	1090	0.1284	182	0.5239	744	0.2279	324	0.1005	143	0.9959	1415	2.3	0.9581	0.5592
47	2	19.53	0	0	0	1	90	0	90	RR	1	5.08	0.83	1.49	135	62.1	38.3	23.8	1.60924	68	3.1	244	92.4	0	0	0	0	0	1	535	0.99	7.1	0	10.9	0.653	471	0.1829	132	0.395	285	0.2129	153	0.1569	113	0.9928	716	1.86	0.9915	0.6381
71	1	17.72	0	1	0	3	96	0	70	LR	0	5.07	1.31	2.76	100	66.1	36.9	29.2	1.2637	179	11.6	597	32.1	0	1	0	1	0	0	1128	4.28	10	0	11.6	0.7675	999	0.1464	191	0.5724	745	0.1743	227	0.0774	101	0.9913	1291	3.28	0.9974	0.3989
32	1	20.76	0	0	0	2	80	0	80	LR	0	6.76	1.54	7.18	147	71.2	42.3	28.8	1.46875	148	6.4	389	53.2	0	1	0	0	0	1	581	19.42	13.2	0	10	0.7402	1200	0.1744	283	0.3991	647	0.261	423	0.0768	125	0.9914	1608	1.53	0.9806	0.7355
55	1	33.02	1	1	0	3	225	1	95	LP	1	7.28	2.2	6.16	165	78	45.5	32.5	1.4	136	10.82	675	50.1	0	1	1	1	0	1	378	4.61	53.7	0	93.9	0.6864	1662	0.163	395	0.3708	898	0.2711	656	0.1462	354	0.9956	2411	1.37	0.9357	0.6589
46	1	20.76	0	0	0	3	77	1	95	LR	0	4.97	1.51	2.76	138	65.7	43.1	22.6	1.90708	79	7.1	383	102.4	0	0	0	0	0	1	287	1	9.6	0	8.7	0.7516	1146	0.1569	239	0.5128	782	0.1901	290	0.0895	136	0.998	1521	2.7	0.9492	0.7623
69	2	26.67	1	1	0	1	72	0	125	RR	0	3.55	1.47	1.76	130	64.7	37.7	27	1.3963	84	6.26	297	61.3	0	0	1	0	0	0	357	4.13	28.1	0	50.6	0.5996	951	0.1545	245	0.3894	617	0.1605	255	0.2421	384	0.9962	1580	2.43	0.9614	0.5321
63	1	16.53	0	0	0	1	360	0	86	RR	0	5.14	2.11	2.38	120	63	37.9	25.1	1.50996	82	5.16	414	87.3	0	1	0	0	0	1	462	1	11.3	0	9.9	0.7216	1663	0.1124	259	0.6011	1385	0.1062	245	0.1644	379	0.9984	2301	5.66	0.9786	0.6333
55	2	21.76	0	1	0	1	64	1	83	RR	0	4.81	1.82	2.53	137	66.5	40.4	26.1	1.54789	58	5.2	214	100	0	0	0	0	0	1	274	1	10.3	0	6.8	0.7326	1237	0.1742	294	0.4848	818	0.2155	364	0.0807	136	0.9875	1667	2.25	0.9625	0.613
33	1	22.41	0	0	0	1	35	0	47	RR	0	5.19	2.13	4.24	170	84.2	49.8	34.4	1.44767	72	7.17	434	116.5	0	1	0	1	0	1	308	2.74	8.7	0	9.4	0.7121	1391	0.1782	348	0.4011	783	0.2412	471	0.0974	190	0.9877	1929	1.66	0.9572	0.7732
57	2	26.44	0	1	0	1	126	0	83	RR	0	4.35	1.32	2.54	126	68.3	38	30.3	1.25413	56	6.3	299	99.7	0	1	1	0	0	0	556	1	12.5	0	8.9	0.743	928	0.164	205	0.4545	568	0.2268	283	0.0869	109	0.9939	1242	2	0.9829	0.7778
50	1	23.88	0	0	0	3	88	1	86	RR	0	5.93	2.77	2.7	121	67.8	41.4	36.4	1.13736	97	6.1	538	78.1	0	0	0	0	0	1	531	2.3	99.5	0	7.8	0.823	2107	0.0535	137	0.5557	1423	0.2305	590	0.1211	310	0.9976	2554	2.41	0.946	0.5297
30	1	27.13	0	0	1	1	288	1	170	RP	0	6.3	1.6	6.01	160	73	40.7	32.3	1.26	82	5.21	328	110.1	0	1	1	1	0	0	384	19.67	16	0	28.2	0.8383	1608	0.0968	186	0.6018	1154	0.2099	403	0.0613	118	0.9964	1912	2.87	0.9963	0.6919
48	1	23.48	0	1	0	2	252	1	93	RP	1	4.43	1.82	2.06	135	72.9	41.2	31.7	1.3	77	4.76	384	102	0	0	0	0	0	0	517	1	86.9	0	14	0.7826	1916	0.1632	399	0.6161	1508	0.1365	334	0.0531	130	0.9989	2445	4.51	0.9956	0.7695
70	1	29.3848	0	0	1	2	1512	1	208	LP	1	3.8	1.47	1.32	85	80.9	33.7	47.2	0.713983	307	6.64	670	18.1	0	0	1	1	0	1	4888	278.4	21.6	0	45.6	0.7412	1538	0.0241	39	0.4281	699	0.4857	794	0.0329	54	0.9982	1631	0.88	0.8324	0.2806
54	2	25.5296	0	1	0	1	66	1	117	RP	1	10	2.45	6.39	129	82.5	43.1	39.4	1.09391	154	8.04	563	32.7	0	0	0	0	0	1	603	6.85	7.9	0	8.6	0.5997	1718	0.198	567	0.432	1237	0.1248	357	0.1963	562	0.994	2847	3.46	0.9985	0.81
48	1	27.0416	0	0	0	2	255	1	73	LP	0	5.87	2.56	2.63	152	75.2	47.3	27.9	1.69534	62	4.81	467.3	111.5	0	0	1	0	0	0	322	2.92	8.3	0	9	0.6122	1635	0.2207	589	0.3684	984	0.2079	555	0.1578	422	0.9907	2646	1.77	0.9604	0.7079
44	2	19.8141	0	0	0	1	224	0	61	RP	0	4.83	1.4	2.98	101	68.9	35.6	33.3	1.06907	62	4.43	288	105.6	0	0	1	0	0	0	574	1	3	0	10.3	0.6275	1012	0.2441	394	0.4178	674	0.1789	289	0.0992	160	0.9708	1566	2.34	0.9867	0.597
53	1	24.8016	0	0	0	1	120	1	48	RP	1	6.83	2.52	3.6	140	71.1	42	29.1	1.4433	78	5.3	432	98	0	0	0	0	0	0	1368	1	31.7	0	3	0.6982	1404	0.1817	365	0.3945	794	0.1883	379	0.1162	234	0.9961	2003	2.1	0.9687	0.6417
53	1	23.8087	0	1	0	2	240	1	92	LP	1	8.15	1.85	5.2	159	66.6	37.8	28.8	1.3125	193	8.81	331	33.3	0	1	0	0	0	0	443	7.14	62	0	102	0.6865	1532	0.1183	222	0.5088	955	0.285	535	0.0631	118	0.9979	1872	1.79	0.9967	0.962
11	1	30.0712	0	1	1	1	540	1	103	RP	0	5.95	1.59	3.58	155	70.7	40	30.7	1.30293	71	4.83	252	101.8	0	0	0	0	0	0	346	1	28.4	0	3	0.5112	886	0.235	407	0.3775	654	0.1209	209	0.247	428	0.9932	1721	3.12	0.9636	0.7671
64	1	25.8166	0	1	0	2	216	1	101	LP	0	7.51	2.35	4.36	129	65.1	39	26.1	1.49425	68	5.15	339	95.9	0	1	0	0	0	0	462	1	12.7	0	15.9	0.6325	1516	0.2015	483	0.4034	967	0.2161	518	0.1589	381	0.9929	2380	1.87	0.9938	0.7623
60	1	26.3465	0	1	0	1	81	1	91	RP	0	4.65	1.32	2.91	148	69.4	43.3	26.1	1.659	76	7.67	415	94.3	0	0	0	0	0	1	541	1.56	6.8	0	6.2	0.7601	1083	0.1451	207	0.4374	623	0.2567	366	0.09	128	0.9952	1418	1.7	0.9947	0.5174
56	1	26.1719	0	1	0	1	64	1	83	RU	0	5.73	1.56	3.41	156	63.8	40.2	23.6	1.70339	87	5.9	440	85.4	0	0	0	0	0	0	327	1.69	11.8	0	7	0.7904	1389	0.1693	297	0.538	948	0.2515	440	0.0387	68	0.9984	1754	2.14	0.4874	0.5106
32	1	28.4005	0	0	0	1	108	1	69	RP	0	5.37	1.81	3.05	155	73.6	43.6	30	1.45333	78	4.26	488	113.5	0	1	1	0	0	0	300	1.94	14.9	0	12.9	0.8063	1401	0.1286	233	0.3799	660	0.3736	649	0.0606	105	0.9955	1729	1.02	0.9798	0.7819
52	1	25.5036	0	0	0	1	156	1	87	RR	0	5.91	2.43	2.58	149	67.1	39.1	28	1.39643	85	6.54	439	90.3	0	1	1	1	0	0	551	2.3	16	0	18.8	0.9461	2097	0.0161	36	0.6182	1370	0.3024	670	0.0376	83	0.9998	2216	2.04	0.9673	0.6235
29	1	24.4898	0	0	0	2	90	1	91	LP	1	5.21	1.33	3.28	144	69.1	44.2	24.9	1.7751	112	3.96	574	76.1	0	0	0	0	0	0	391	3.98	19.9	0	19.9	0.7659	1027	0.1763	236	0.2345	314	0.4962	665	0.0534	72	0.9956	1335	0.47	0.906	0.3415
56	1	19.2672	0	1	0	2	180	1	132	LP	1	7.9	1.85	4.46	135	69.5	34	35.5	0.957746	207	9.58	452	29.9	0	0	0	1	0	1	1453	14.82	33.1	1	23.9	0.4315	718	0.1482	247	0.2912	485	0.1283	213	0.4131	688	0.9928	1653	2.27	0.965	0.5843
31	2	20.3125	0	0	0	1	90	1	100	LP	1	6.82	2.57	3.76	133	68	43.6	24.4	1.78689	62	4.51	424	115.7	0	0	0	0	0	0	291	0.98	10.1	0	9.6	0.7527	1682	0.2159	482	0.4772	1066	0.2681	599	0.0284	64	0.997	2228	1.78	0.9207	0.7846
56	2	21.6311	0	0	0	3	216	1	100	RP	1	5.8	2.29	2.94	123	65.3	41.4	23.9	1.73222	70	5.07	266	83.7	0	1	1	0	0	0	156	1.02	14.9	0	7.8	0.6618	1291	0.1723	336	0.4445	867	0.1958	382	0.1587	310	0.9928	1937	2.27	0.9777	0.7994
51	1	29.3848	0	0	0	3	224	1	117	LP	1	5.12	2.49	1.86	137	65.3	41.8	23.5	1.77872	78	4.56	427	99.3	0	1	0	0	0	0	291	1	12.2	0	6.6	0.7653	1792	0.1651	387	0.4548	1065	0.2174	509	0.0678	159	0.9982	2338	2.09	0.9852	0.6221
55	1	23.3556	1	1	0	1	396	1	109	RP	1	7.53	2.51	4.06	136	60	37.3	22.7	1.64317	76	7.3	322	97.6	0	1	0	0	0	0	710	1	9.1	0	8.8	0.6886	2348	0.0983	275	0.5981	1675	0.2077	582	0.0617	173	0.9986	2796	2.88	0.9399	0.581
48	2	24.0346	0	0	0	1	270	1	84	RP	0	5.78	1.85	2.92	124	67.9	37.7	30.2	1.24834	81	5.1	335	74.2	0	1	1	0	0	1	326	0.99	11.6	0	7.5	0.7152	1401	0.1035	203	0.4963	972	0.1851	363	0.1743	341	0.993	1945	2.68	0.9842	0.6802
31	1	22.1453	0	0	0	3	289	1	86	LP	0	5.2	2.2	2.31	136	68.8	40.1	28.7	1.39721	76	5.42	515	115.6	0	1	1	0	0	1	338	20.62	785	0	22.9	0.7826	1916	0.1632	399	0.6161	1508	0.1365	334	0.0531	130	0.9989	2445	4.51	0.9956	0.7695
65	1	25.3515	1	1	0	3	77	1	95	LP	0	6.72	2.17	3.75	88	67.2	39	28.2	1.38298	79	4.02	404	89.6	0	0	1	0	0	0	453	11.67	10.3	0	9.3	0.6414	1412	0.1964	432	0.4003	881	0.1705	375	0.1525	336	0.9903	2180	2.35	0.9658	0.748
48	2	21.3039	1	1	0	3	100	1	78	LP	0	7.78	2	4.86	128	76.9	38.7	38.2	1.01309	102	7.74	650	56.2	0	0	1	0	0	0	540	5.65	10.3	0	20	0.8383	1608	0.0968	186	0.6018	1154	0.2099	403	0.0613	118	0.9964	1912	2.87	0.9963	0.6919
51	1	24.4418	0	1	0	2	80	1	92	RP	0	6.92	2.02	4.2	151	74.2	46.5	27.7	1.6787	102	4.3	269	73	0	1	1	0	0	0	498	2.2	9.7	0	22.1	0.4846	1004	0.1276	264	0.2451	508	0.1966	407	0.3839	795	0.9961	2063	1.25	0.9123	0.5227
34	1	27.6601	0	0	0	1	39	1	104	RP	1	11.37	2.79	7.28	158	70.1	38.2	31.9	1.19749	95	4.6	330	89.6	0	0	0	0	0	0	363	11.78	56.2	0	14.6	0.6329	1607	0.2349	596	0.4172	1059	0.1886	479	0.1293	328	0.9971	2531	2.21	0.9936	0.8373
33	2	26.7094	0	1	0	1	80	1	94	RP	0	5.58	2.69	2.57	145	72.1	45.9	26.2	1.75191	75	3.3	412	90.5	0	1	0	0	0	1	449	1	9.3	0	8.5	0.8078	2088	0.0819	212	0.4154	1074	0.3698	956	0.1066	276	0.9963	2576	1.12	0.9129	0.5041
71	1	20.1092	0	1	0	1	64	0	64	LP	1	5.78	2.63	2.15	117	62.5	35.3	27.2	1.29779	111	4.7	314	57.2	0	0	0	0	0	0	459	6.49	11.1	0	9.7	0.6405	1616	0.2145	541	0.3613	912	0.2431	613	0.1418	358	0.9968	2515	1.49	0.9542	0.3692
58	1	20.7612	0	0	0	1	90	1	89	LP	0	6.97	1.06	4.88	139	69.8	39.1	30.7	1.27362	149	7.32	419	43.9	0	1	0	0	0	0	360	10.87	5.8	0	5.3	0.5922	664	0.1763	198	0.3921	440	0.1868	209	0.2222	249	0.9907	1111	2.1	0.9761	0.7728
49	2	22.0604	0	0	0	1	80	1	92	RP	0	4.45	1.38	2.66	123	59.6	38.8	20.8	1.86538	52	3.3	194	108.1	0	0	1	0	0	0	295	1	12.2	0	5.4	0.8296	1127	0.0894	121	0.573	779	0.2131	290	0.075	102	0.994	1350	2.69	0.9408	0.7481
34	1	20.202	0	0	0	1	54	1	104	RP	0	7.43	2.32	4.52	143	70	43.4	26.6	1.63158	69	4.79	329	117.7	0	1	0	0	0	1	423	1	28.3	0	9.9	0.6805	1260	0.1691	367	0.3016	655	0.2339	508	0.246	534	0.9956	2161	1.29	0.961	0.6837
51	2	22.4059	0	0	0	3	154	1	107	LP	0	3.15	1.04	1.82	108	64.7	39.3	25.4	1.54724	66	3.73	250	93.1	0	0	0	0	0	1	382	1.01	13.5	0	10.8	0.7616	913	0.1676	201	0.4104	492	0.3372	404	0.0684	82	0.9976	1196	1.22	0.9432	0.3518
49	2	24.51	0	0	0	2	143	1	82	LP	1	5.03	1.79	2.31	127	55.9	32.9	23	1.43043	60	3.59	218	103.1	0	1	1	1	0	0	578	8.72	18.7	0	14.7	0.6977	1170	0.147	246	0.4545	762	0.2202	369	0.1507	253	0.9954	1669	2.06	0.9153	0.6917
42	2	23.72	0	0	0	2	70	0	44	LR	0	4.8	1.77	2.59	127	56	33.6	22.4	1.5	77	2.95	293	82.3	0	1	0	0	0	0	247	7.83	26.4	0	6.3	0.6863	1163	0.1073	182	0.4181	709	0.2418	410	0.1987	337	0.9923	1682	1.73	0.9376	0.6169
32	2	19.64	0	0	1	3	130	1	103	RP	0	5.75	1.95	3.3	129	65.3	41.5	23.8	1.7437	87	6.3	344	76.2	0	1	1	0	0	0	189	6.84	50.5	0	23.6	0.803	1596	0.0763	152	0.5517	1096	0.1959	389	0.1138	226	0.9931	1974	2.82	0.9919	0.6742
51	2	20.04	0	0	0	1	220	1	50	RP	0	5.64	1.1	3.91	121	64	39.7	24.3	1.63374	50	5.1	197	108	1	1	1	1	0	1	204	19.7	30.3	0	7.4	0.791	945	0.1017	122	0.4591	548	0.2914	348	0.102	122	0.9947	1189	1.58	0.9853	0.7671
56	1	23.47	0	1	1	2	30	1	86	LP	0	4.44	1.62	2.47	154	63.6	37.5	26.1	1.43678	106	4.8	271	67.3	0	0	1	0	0	0	319	47.84	8.1	1	13.8	0.572	838	0.0404	59	0.3244	475	0.2141	314	0.3859	565	0.9983	1462	1.52	0.6331	0.5698
30	2	19.67	0	0	0	2	56	1	48	LP	0	6.46	2.59	3.09	116	64	35.5	28.5	1.24561	75	3.6	162	92.4	1	1	0	0	0	0	387	5.03	81.2	0	5.9	0.8243	1618	0.1391	273	0.3985	782	0.3532	693	0.0319	63	0.9953	1954	1.13	0.9406	0.7882
28	1	20.49	0	0	0	3	49	1	40	RU	0	5.98	1.86	3.33	145	58.5	40.6	17.9	2.26816	106	3.03	352	81.9	0	0	0	0	0	0	279	7.62	81.6	0	37.2	0.7709	1369	0.139	247	0.6005	1066	0.1465	260	0.0788	140	0.9887	1756	4.1	0.9978	0.8971
59	1	23.57	0	0	1	2	58	0	45	LP	0	7.08	2.82	3.46	133	63.7	38.3	25.4	1.50787	100	7	340	70.7	0	1	1	0	0	0	346	19.1	41.7	0	9.4	0.7026	1717	0.1138	278	0.2833	692	0.3939	963	0.1712	418	0.9876	2413	0.72	0.9821	0.7577
65	1	19.46	0	0	0	2	42	1	75	LP	1	4.99	1.31	2.83	127	62.1	36.8	25.3	1.45455	86	4.8	281	81.9	0	0	0	0	0	1	497	21.96	23.3	0	21.3	0.7537	1164	0.0928	143	0.3881	599	0.2667	412	0.1524	235	0.9989	1542	1.46	0.9095	0.3509
31	1	20	0	1	0	2	157	0	69	LP	1	5.26	2.23024	2.43	135	69.7	40.4	29.3	1.37884	93	5.2	278	93.9	1	1	0	0	0	0	538	18.4	31.4	0	7.1	0.4713	1609	0.211	458	0.4252	923	0.2647	575	0.0414	90	0.9937	2157	1.61	0.9972	0.7368
54	2	26.78	1	0	0	2	513	0	100	LP	1	4.55	1.75175	2.21	127	62.4	36.3	26.1	1.3908	65	4.43	205	92.9	1	0	1	1	0	1	324	10.34	10.1	0	17.5	0.6517	1018	0.119	186	0.4296	671	0.2047	320	0.2244	350	0.9951	1554	2.1	0.8623	0.5869
51	2	19.43	0	0	0	2	42	1	55	LP	0	3.93	1.59165	1.73	130	62.7	36.5	26.2	1.39313	54	3.3	279	105.3	0	1	1	0	0	0	602	4.46	9.2	0	26.6	0.7659	1184	0.1303	201	0.4288	663	0.2856	441	0.1009	156	0.9971	1541	1.5	0.9473	0.803
45	2	23.38	0	0	0	2	442	1	85	LP	1	7.07	1.92304	4.41	91	55.6	31.1	24.5	1.26939	56	3.6	210	108.5	0	0	1	0	0	0	279	36.41	7.1	0	43.5	0.7249	1418	0.1768	346	0.5475	1071	0.1481	290	0.0933	182	0.995	1946	3.7	0.9995	0.8629
30	2	21.69	0	0	0	2	346	1	126	LP	1	4.84	2.05216	2.43	126	59.2	36.2	23	1.57391	56	3.14	312	120.5	0	0	1	0	0	0	736	25.08	21.3	0	8.1	0.6808	522	0.1051	81	0.3323	255	0.288	221	0.1973	151	0.9832	754	1.15	0.8923	0.5264
50	2	23.58	0	0	0	1	396	1	78	RP	0	5.27	1.87085	2.87	117	68.4	41.5	26.9	1.54275	94	4.63	223	61.1	0	0	0	0	0	0	319	12.51	26.7	0	9.6	0.7085	699	0.1141	113	0.4855	479	0.2052	203	0.1636	161	0.9862	973	2.37	0.957	0.6346
59	1	21.46	0	0	0	2	36	0	32	LP	0	6.72	2.3184	3.51	159	58.4	35.2	23.2	1.51724	99	6.66	317	71.5	0	0	0	0	0	0	457	14.56	7.9	0	6.3	0.6963	1608	0.0687	159	0.4915	1135	0.1878	434	0.2286	528	0.9936	2295	2.62	0.9768	0.774
61	1	27.63	0	1	0	2	240	1	72	RP	0	6.69	1.7394	4.25	128	64.7	37.7	27	1.3963	131	8.3	423	50.3	0	0	0	0	0	0	329	17.23	40.2	0	13.7	0.7852	1270	0.1219	197	0.5651	914	0.1949	315	0.0857	139	0.9928	1606	2.9	0.9495	0.4272
59	1	28.12	0	0	0	2	120	0	80	LP	1	4.45	1.5486	2.3	136	47.4	32.4	15	2.16	110	6.4	215	63	0	1	0	1	0	1	478	21.07	52.8	0	14.6	0.6822	774	0.0612	69	0.4103	465	0.2481	281	0.2377	269	0.9811	1112	1.65	0.9964	0.7158
49	1	24.69	0	0	0	2	192	1	45	LP	0	11.29	3.2741	6.94	144	68.6	38.4	30.2	1.27152	63	3.84	351	110	0	0	0	0	0	1	235	9.72	31.3	0	8.8	0.7552	1706	0.1711	387	0.5876	1327	0.1479	334	0.0554	125	0.9817	2218	3.97	0.9991	0.8833
59	2	25.13	1	0	0	1	216	0	45	RP	0	4.56	1.81944	2.38	116	61.8	36.2	25.6	1.41406	76	3.15	266	74.2	0	0	0	0	0	0	635	12.51	12.3	0	9.9	0.6806	1063	0.2053	321	45.51	711	0.195	305	0.1018	159	0.9877	1543	2.33	0.9888	0.7429
44	1	26.17	0	0	0	3	600	1	107	RP	0	5.9	2.0001	3.27	132	71.4	43.1	28.3	1.52297	135	7.6	268	54.6	0	1	1	0	0	1	589	8.57	21.6	0	12.1	0.6669	1283	0.2304	443	49.17	946	0.1523	293	0.0956	184	0.9929	1910	3.23	0.9988	0.8222
39	1	19.73	0	0	0	2	168	1	76	LP	0	4.71	1.68147	2.32	146	68	42.3	25.7	1.64591	58	4.9	314	122.1	0	0	0	0	0	0	207	1	11.3	0	13.7	0.7623	1176	0.1177	182	0.3772	582	0.3499	540	0.1125	173	0.9925	1531	1.08	0.9866	0.8855
61	1	20.49	0	0	0	1	285	1	52	RP	0	4.82	1.2291	3.11	143	58.5	33.1	25.4	1.30315	122	5	379	54.8	0	1	0	0	0	0	219	28.29	26.4	0	25.8	0.6239	644	0.0856	88	0.4444	458	0.1615	167	0.2575	266	0.967	998	2.75	0.9747	0.8701
56	1	21.26	0	1	0	1	510	0	52	RP	0	6.87	1.84116	4.32	140	62.1	36.3	25.8	1.40698	90	4.27	351	82	0	1	0	0	0	0	347	21.12	9.5	0	7.7	0.6986	1243	0.0755	134	0.3852	685	0.2614	465	0.2153	383	0.9894	1760	1.47	0.9423	0.7683
44	2	23.12	0	0	0	2	195	1	80	LP	1	8	1.4	6.17	113	63.7	39.3	24.4	1.61066	54	2.3	370	110.6	0	1	1	0	0	0	499	37.51	11	0	21.4	0.7041	1026	0.1253	182	0.3956	576	0.2486	362	0.154	224	0.9834	1432	1.59	0.9982	0.8099
39	1	24.94	1	0	0	2	1236	0	100	LP	1	7.04	2.66816	3.76	152	63.8	37.7	26.1	1.44444	104	4.33	480	77.6	0	0	1	0	0	0	517	7.39	81.6	0	25.3	0.7336	2080	0.1451	411	0.4178	1185	0.2507	711	0.0985	279	0.9772	2770	1.67	0.97	0.6375
58	2	18.76	0	0	0	2	438	1	30	LP	0	5.35	2.18815	2.52	121	69.4	38.3	31.1	1.23151	62	3.06	160	95.8	0	0	0	0	0	0	387	36.28	91.5	0	10.6	0.7703	1628	0.1591	336	0.392	829	0.3594	760	0.0577	122	0.9871	2086	1.09	0.9121	0.7868
47	1	22.22	0	0	0	2	784	1	68	LP	0	5.54	1.24096	3.76	116	62.2	36.6	25.6	1.42969	88	4.3	187	89.7	0	0	1	1	0	0	264	30.1	12.4	1	9.4	0.7221	880	0.1391	170	0.4278	521	0.2613	318	0.1242	151	0.9854	1201	1.64	0.9896	0.8129
57	1	25.43	0	0	0	3	369	0	95	RP	0	4.97	1.33196	3.12	127	66.8	39.1	27.7	1.41155	126	4.4	244	54.2	0	0	0	0	0	0	221	161.6	8.3	0	8.4	0.6003	775	0.0813	105	0.3892	502	0.1369	177	0.307	396	0.9886	1276	2.84	0.9909	0.5604
30	1	26.19	0	0	0	2	323	0	110	LP	0	5.22	1.64952	3.11	138	58.8	41.9	16.9	2.47929	70	1.94	327	120.4	0	1	1	1	0	0	301	6.86	17.8	0	7.6	0.7265	1129	0.1714	266	0.4226	657	0.2717	422	0.0801	125	0.978	1520	1.56	0.964	0.7743
54	1	19.18	0	1	0	1	286	0	80	RP	0	6.43	2.23121	3.49	146	67.8	41.1	26.7	1.53933	75	4.19	383	98.9	0	1	1	0	0	1	407	14.2	17.1	0	6.1	0.7541	1620	0.0719	154	0.5775	1241	0.1529	329	0.1521	327	0.9781	2101	3.78	0.9537	0.5867
51	1	21.79	0	0	0	1	348	1	85	RP	1	3.81	1.39827	1.93	157	63.5	39.7	23.8	1.66807	71	4.01	245	103.3	0	1	1	1	0	0	812	13.67	42.2	0	13.6	0.6944	1060	0.128	195	0.5097	778	0.1665	254	0.1668	255	0.9892	1510	3.06	0.9718	0.8569
36	1	20.73	0	0	0	2	91	1	65	RP	0	5.54	2.28248	2.56	150	60.3	38.4	21.9	1.75342	84	4.9	334	102.5	0	0	1	0	0	1	261	8.82	21.6	0	15.7	0.7469	1800	0.1106	267	0.4442	1070	0.2711	653	0.1357	327	0.9932	2394	1.64	0.9985	0.9152
56	1	20.39	1	0	0	2	224	1	131	RP	1	5.09	1.19106	3.08	113	57.2	35.9	21.3	1.68545	119	3.93	213	58.5	1	1	1	1	0	0	520	37.94	41.7	0	16.9	0.7192	880	0.1542	189	0.5093	623	0.1848	226	0.0983	120	0.9717	1189	2.76	0.9939	0.8543
57	1	19.89	0	0	1	3	249	1	98	RP	0	3.04	1.89088	0.66	150	61.5	34.4	27.1	1.26937	67	3.45	214	101.4	0	1	0	0	0	0	314	14.82	13.4	0	24.3	0.7466	804	0.0846	143	0.3446	581	0.1288	217	0.433	731	0.9942	1678	2.68	0.963	0.7807
56	1	21.19	0	0	1	3	480	1	91	LP	1	8.59	2.61136	5.41	138	62.9	37.1	25.8	1.43798	100	5.21	611	72.2	0	0	1	1	0	0	816	3.52	19.4	0	8.3	0.7547	1357	0.169	304	0.5354	963	0.192	345	0.0539	97	0.9776	1758	2.79	0.9972	0.8022
48	1	26.3	0	0	0	2	145	0	23	LP	0	5.14	1.76816	2.85	150	63.5	42.7	20.8	2.05288	75	4.05	336	103.1	0	0	1	0	0	0	417	6.9	20.3	0	7.9	0.6875	1061	0.1421	219	0.3726	575	0.2863	442	0.1519	234	0.9815	1514	1.3	0.9471	0.5818
53	1	25.72	0	1	0	2	108	0	64	LP	1	8.29	2.72741	4.45	137	54.7	31.1	23.6	1.3178	80	4.71	372	96.9	0	1	1	0	0	1	505	21.6	18.8	0	14.6	0.6989	1635	0.21	491	0.4198	982	0.2526	591	0.0805	188	0.9894	2314	1.66	0.9986	0.8113
32	1	23.19	0	0	0	2	72	0	76	LP	1	5.61	2.40108	2.48	157	65.3	38.9	26.4	1.47348	126	7.87	363	64.1	0	1	0	0	0	0	313	4.8	9.9	0	34.2	0.6764	1005	0.052	68	0.3646	478	0.3298	432	0.1776	233	0.996	1306	1.11	0.8545	0.5703
20	1	22.76	0	0	0	2	246	0	41	LP	0	5.86	1.7873	3.44	154	75.2	46.8	28.4	1.64789	83	6.43	321	116.4	0	0	0	0	0	1	246	5.55	23.8	1	8.6	0.7115	1053	0.1939	287	0.3989	590	0.2774	410	0.0852	126	0.9906	1466	1.44	0.9825	0.8459
55	1	25.19	0	0	0	2	72	0	80	LP	0	7.52	2.42144	4.17	139	58.9	35.9	23	1.56087	90	7.39	283	82.5	0	0	0	1	0	0	269	3.69	24.5	0	7.9	0.7753	1652	0.1237	264	0.5751	1225	0.1752	373	0.0958	204	0.9948	2120	3.28	0.9822	0.6954
48	1	22.54	0	0	0	3	108	1	56	RP	0	4.31	1.03009	2.75	129	60.2	37.6	22.6	1.66372	170	6.1	455	40.2	0	0	0	0	0	0	273	5.95	33.4	0	9.3	0.6827	769	0.0708	80	0.4188	472	0.2218	250	0.2313	261	0.9848	1110	1.89	0.8274	0.3034
37	1	19.59	1	0	0	3	84	0	115	RP	1	14.68	0.6606	13.51	135	69.1	41.2	27.9	1.4767	81	8.2	492	106.4	0	0	0	0	0	0	510	11.37	35.7	0	9.4	0.6717	1122	0.1142	168	0.4657	686	0.2215	326	0.1047	154	0.9806	1444	2.1	0.8482	0.6682
55	2	21.57	0	0	0	2	91	0	57	LP	0	3	1.08	1.53	114	53.8	32.8	21	1.5619	66	5.3	269	90.5	0	1	0	0	0	0	238	7.94	33.3	0	25.8	0.7699	736	0.1524	146	0.5606	536	0.1483	142	0.0744	71	0.9967	953	3.78	0.9868	0.4819
39	1	23.64	0	1	0	1	77	1	52	RP	0	5.45	1.62955	3.32	146	54.4	35	19.4	1.80412	73	7.08	322	111.1	1	1	0	1	0	0	379	6.08	38.4	0	24.6	0.8766	1391	5.24	83	0.454	721	0.397	630	0.0691	110	0.9981	1584	1.14	0.9469	0.5792
	1 for male, 2 for female	BMI, Body Mass Index	0 means no diabetes, 1 means diabetes	0 means no hypertension, 1 means hypertension	0 means no staghorn calculi, 1 means staghorn calculi	1 represents left urinary tract stones, 2 represents right urinary tract stones, 3 represents bilateral urinary tract stones		0 means no hydronephrosis, 1 means hydronephrosis		LP, Left Percutaneous Nephrolithotomy; RP, Right Percutaneous Nephrolithotomy	0 represents SIRS did not occur, 1 represents SIRS occurred													0 means negative urine culture, 1 means positive urine culture	0 means hematuria negative, 1 means hematuria positive	0 means urine leukocyte negative, 1 means urine leukocyte positive	0 means urine protein negative, 1 means urine protein positive	0 means urine nitrite negative, 1 means urine nitrite positive	0 means IL-1β < 5 pg/mL; 1means IL-1β > 5 pg/mL				0 means IL-10 < 5 pg/mL; 1means IL-10 > 5 pg/mL
[truncated: 6 more columns]
